# Supplementary material for: Microeukaryotic Communities on the Fruit of Gardenia thunbergia Thunb. with a Focus on Pathogenic Fungi
Source: MDPI journal article supplement (doi:10.3390/pathogens10050555), 2021-05-04
Supplement: s1 [file s1]

Table S1: Samples used in this study

| sample number | Source                                            | sampled material   | location                                               | coordinates S | coordinates E |
|---------------|---------------------------------------------------|--------------------|--------------------------------------------------------|---------------|---------------|
| 1             | <i>Caesalpinia ferrea</i> C.Mart. ex Tul.         | tree bark          | Durban, Sherwood, Strawberry Fields                    | 29°49'49.8"   | 30°58'04.7"   |
| 2             | <i>Encephalartos ferox</i> G. Bertol.             | leaf scale         | Durban, Reservoir hills                                | 29°4'16.6"    | 30°56'16.5"   |
| 3             | Cement wall                                       | surface            | Durban, Chatsworth, Unit 2                             | 29°55'10.3"   | 30°55'00.2"   |
| 4             | <i>Syagrus romanzoffiana</i> (Cham.) Glassman     | stem surface bark  | Durban, Sherwood, Strawberry Fields                    | 29°49'46.5"   | 30°58'13.8"   |
| 5             | Storm water open cement wall                      | surface            | Durban, Sherwood, Strawberry Fields                    | 29°49'48.4"   | 30°58'04.1"   |
| 6             | Floor cement outside                              | surface            | Durban, Sherwood, Strawberry Fields                    | 29°49'47.7"   | 30°58'09.5"   |
| 7             | <i>Trichilia emetica</i> Vahl                     | bark surface       | Durban, University of KwaZulu-Natal (Westville Campus) | 29°49'00.6"   | 30°56'26.0"   |
| 8             | <i>Codiaeum variegatum</i> (L.) Rumph. ex A. Juss | bark surface       | Durban, Chatsworth, Unit 2                             | 29°55'10.3"   | 30°55'00.2"   |
| 9             | <i>Yucca gigantea</i> Lim.                        | stem surface       | Durban, Sherwood, Strawberry Fields                    | 29°49'48.5"   | 30°58'11.1"   |
| 10 to 16      | <i>Gardenia thunbergia</i> Thunb.                 | indehiscent fruits | Durban, Sherwood, Strawberry Fields                    | 29°49'50.3"   | 30°58'06.9"   |

Table S2: Similarity values between the replicates of one sample. Note that, besides from samples Afr\_12 and Afr\_14, the samples from the *G. thunbergia* Thunb. fruits are very similar in the replicates.

| sample | comparison | r value |       |
|--------|------------|---------|-------|
| Afr_1  | a~b        |         | 0.862 |
| Afr_1  | a~c        |         | 0.805 |
| Afr_1  | b~c        |         | 0.94  |
| Afr_2  | a~b        |         | 0.974 |
| Afr_2  | a~c        |         | 0.984 |
| Afr_2  | b~c        |         | 0.93  |
| Afr_3  | a~b        | /       |       |
| Afr_3  | a~c        | /       |       |
| Afr_3  | b~c        | /       |       |
| Afr_4  | a~b        |         | 0.878 |
| Afr_4  | a~c        |         | 0.953 |
| Afr_4  | b~c        |         | 0.859 |
| Afr_5  | a~b        |         | 0.734 |
| Afr_5  | a~c        |         | 0.985 |
| Afr_5  | b~c        |         | 0.745 |
| Afr_6  | a~b        |         | 0.991 |
| Afr_6  | a~c        |         | 0.924 |
| Afr_6  | b~c        |         | 0.878 |
| Afr_7  | a~b        |         | 0.771 |
| Afr_7  | a~c        |         | 0.784 |
| Afr_7  | b~c        |         | 0.998 |
| Afr_8  | a~b        |         | 0.541 |
| Afr_8  | a~c        |         | 0.754 |
| Afr_8  | b~c        |         | 0.878 |
| Afr_9  | a~b        |         | 0.993 |
| Afr_9  | a~c        |         | 0.993 |
| Afr_9  | b~c        |         | 0.999 |
| Afr_10 | a~b        |         | 0.948 |
| Afr_10 | a~c        |         | 0.998 |
| Afr_10 | b~c        |         | 0.924 |
| Afr_11 | a~b        |         | 0.994 |
| Afr_11 | a~c        |         | 0.973 |
| Afr_11 | b~c        |         | 0.979 |
| Afr_12 | a~b        |         | 0.721 |
| Afr_12 | a~c        |         | 0.995 |
| Afr_12 | b~c        |         | 0.729 |
| Afr_13 | a~b        |         | 0.963 |
| Afr_13 | a~c        |         | 0.999 |
| Afr_13 | b~c        |         | 0.967 |
| Afr_14 | a~b        |         | 0.729 |
| Afr_14 | a~c        |         | 0.804 |
| Afr_14 | b~c        |         | 0.954 |
| Afr_15 | a~b        |         | 0.991 |
| Afr_15 | a~c        | /       |       |
| Afr_15 | b~c        | /       |       |
| Afr_16 | a~b        |         | 0.954 |
| Afr_16 | a~c        |         | 0.957 |
| Afr_16 | b~c        |         | 0.995 |
| mean   |            |         | 0.899 |

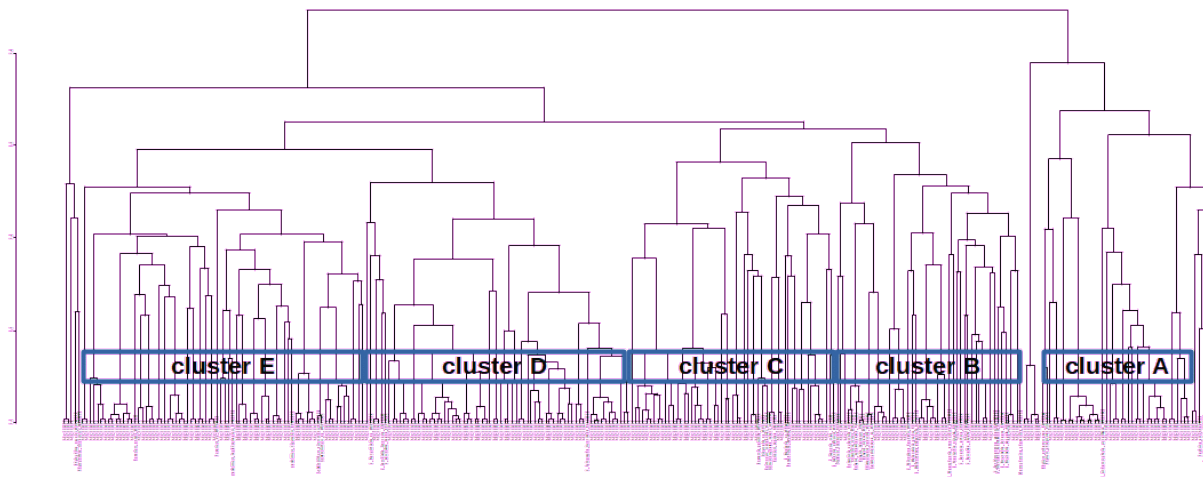

Figure S1: Overview on the clusters based on the dendrogram including all sequences. The remaining sequences not included in clusters A to E are treated as cluster F in the main paper.

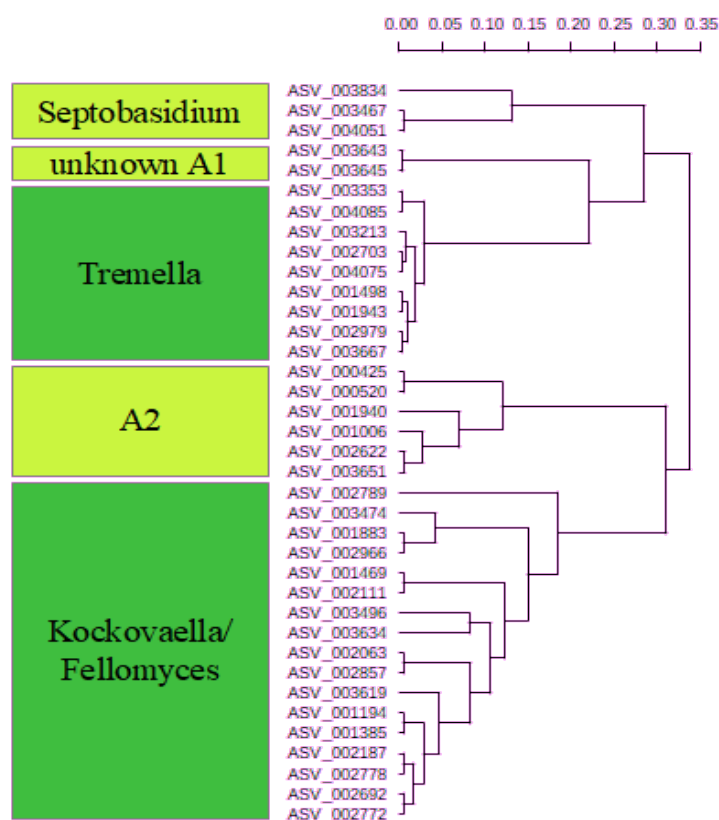

Fig. S2: Dendrogram of the Basidiomycota clade A. Dark green boxes indicate clusters that are very unlikely to contain plant pathogens, light green clusters may contain plant pathogens. The level of difference is given in the scale.

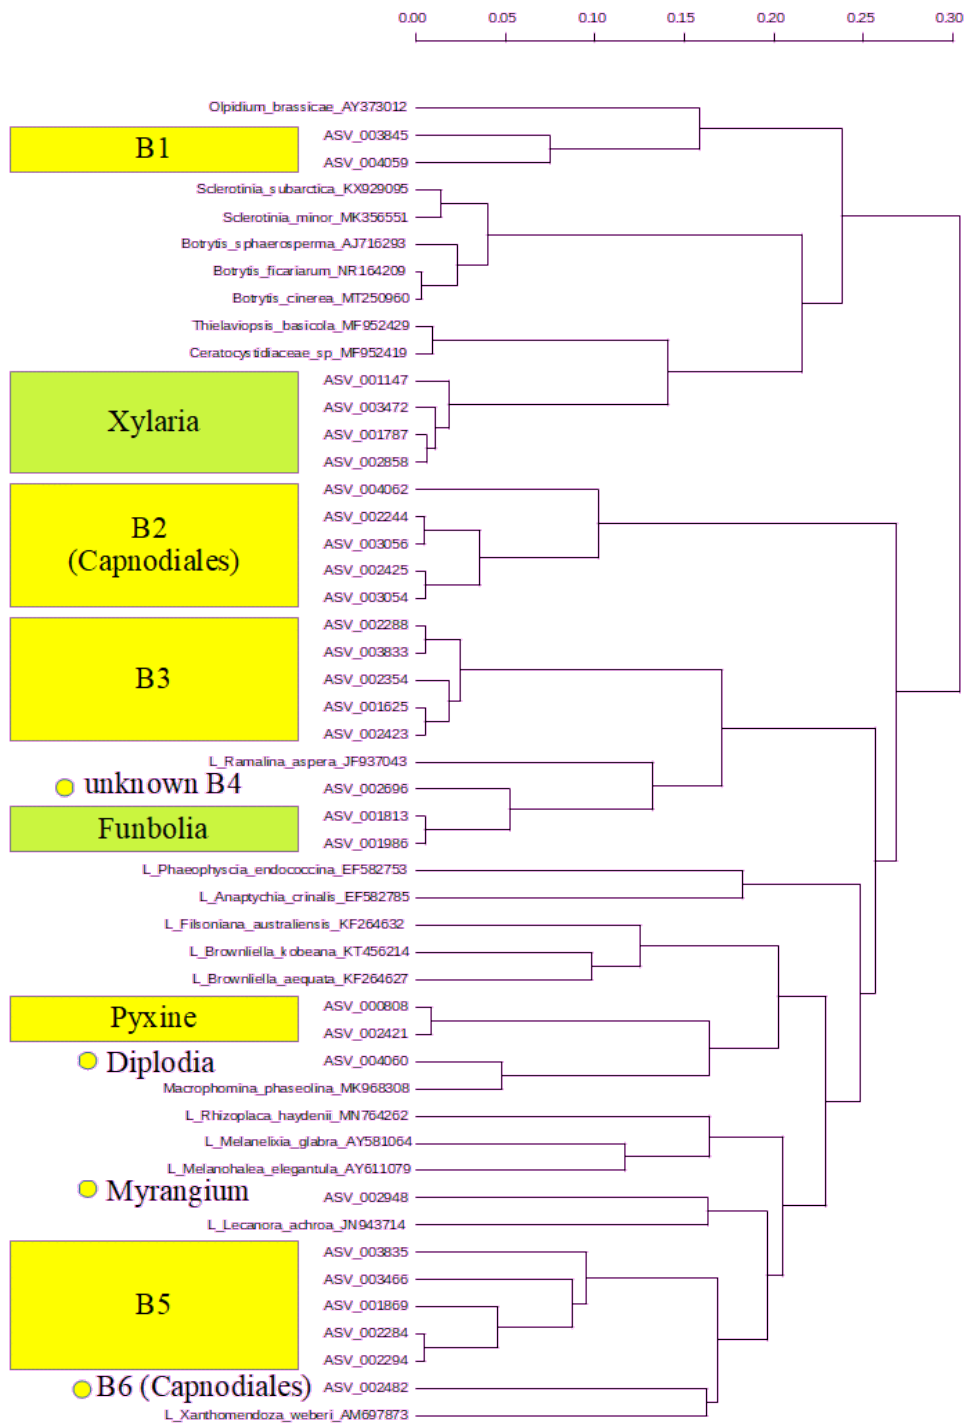

Fig. S3: Dendrogram of cluster B. Light green clusters that are unlikely to contain plant pathogens, yellow clusters can not be classified regarding their pathogenic potential. Singleton sequences distinct from other clusters if those are not known or determined as another taxon of the next neighbouring clade are marked with a dot. The level of difference is given in the scale.

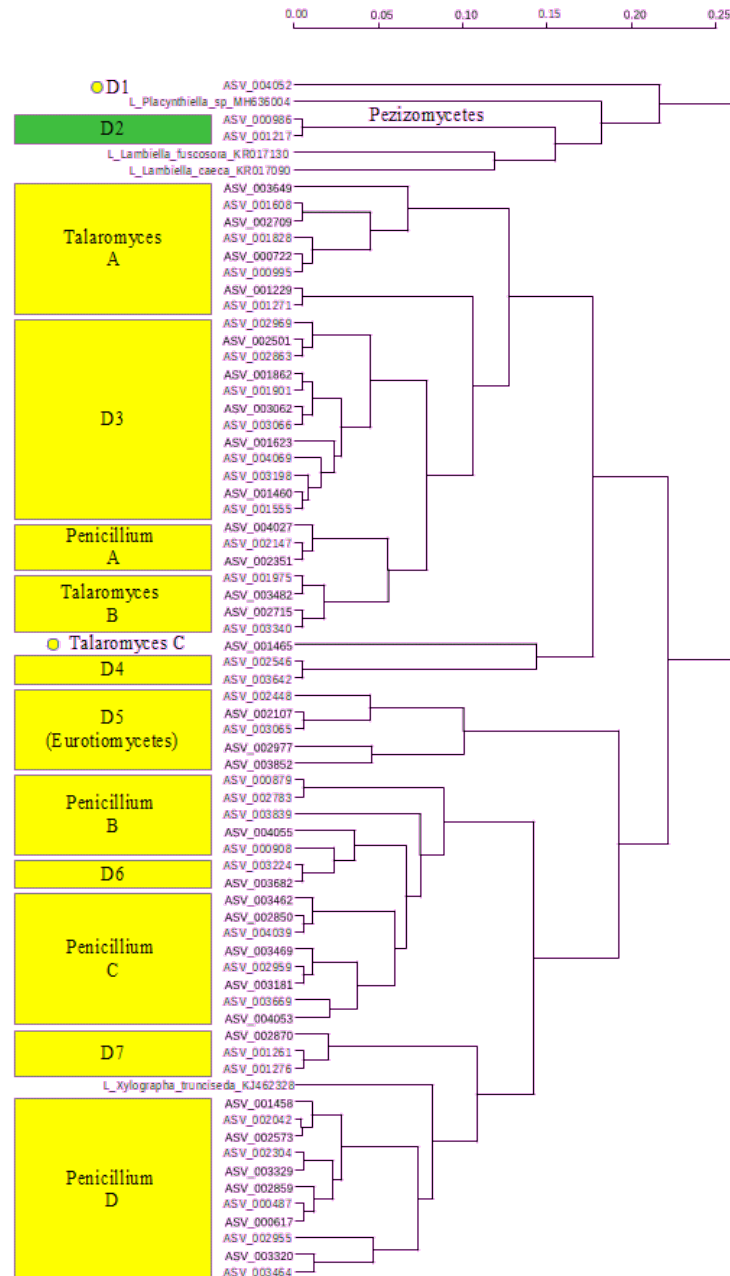

Fig. S4: Dendrogram of cluster D, consisting mainly of *Talaromyces* and *Penicillium*. The dark green cluster represents a likely lichen fungus clade, the yellow clusters can not be classified with respect to their plant pathogen potential. Dots are used for singleton sequences (see Fig. 2). Note that single species of *Penicillium* and *Talaromyces* can be pathogenic to a variety of organisms. The level of difference is given in the scale.

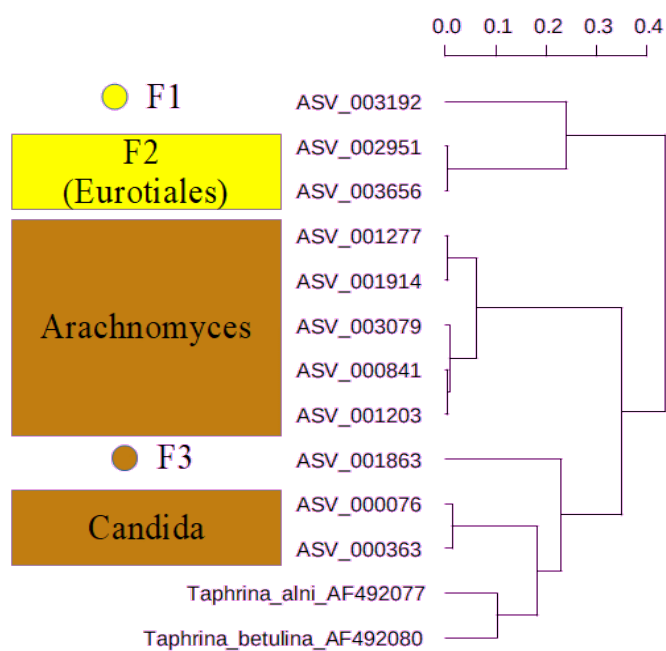

Fig. S5: Dendrogram of cluster F. The yellow clade can not be classified regarding the plant pathogen potential, the brown clades represent likely animal pathogens. Dots are used for singleton sequences (see Fig. 2). The level of difference is given in the scale.
